# Supplementary material
Source: Springer Nature journal article supplement (https://www.springermedizin.de/resource/supplementary/12950_2007_64_MOESM4_ESM.pdf/9557930)

**FTI (nM)**

10,000 1,000 100 10 1 0

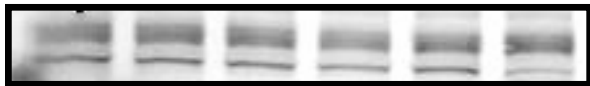

**IB: Phospho-RP3**

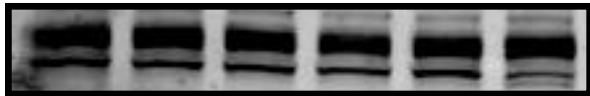

**IB: Total-RP3**

Supplement: MOESM4 [file 9557930]
